# Supplementary material for: Non-Invasive Brain Stimulation Effects on Biomarkers of Tryptophan Metabolism: A Scoping Review and Meta-Analysis
Source: MDPI journal article supplement (doi:10.3390/ijms23179692), 2022-08-26
Supplement: s1 [file s1]

(a) Clinical studies

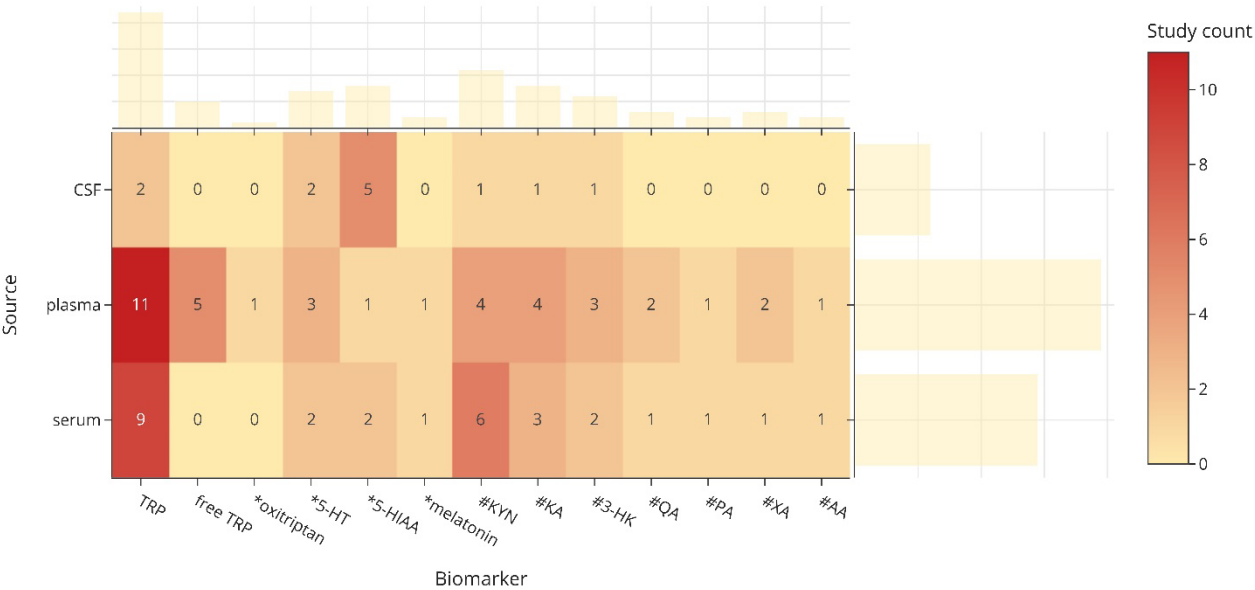

(b) Preclinical studies (brain regions collapsed)

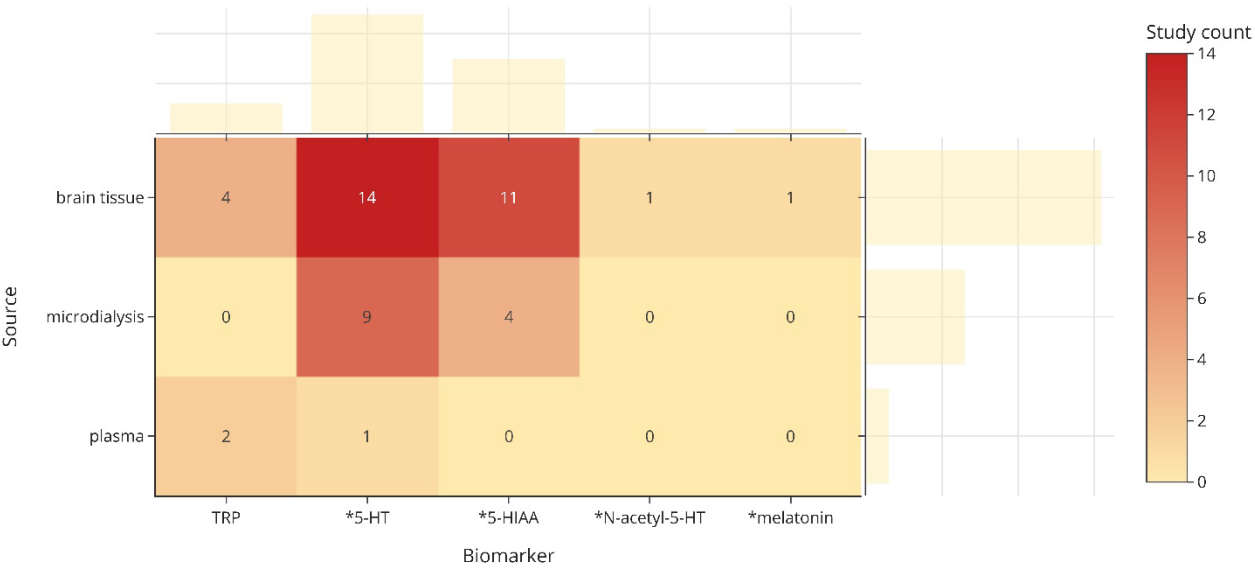

(c) Preclinical studies (individual regions of brain tissue)

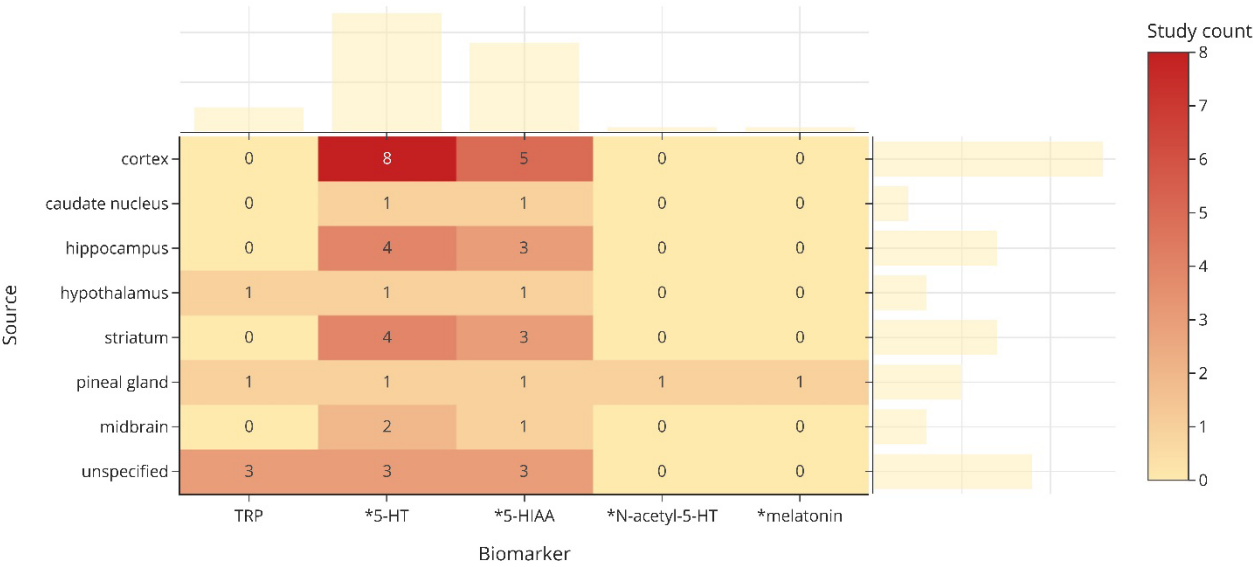

(d) Preclinical studies (individual regions of microdialysis)

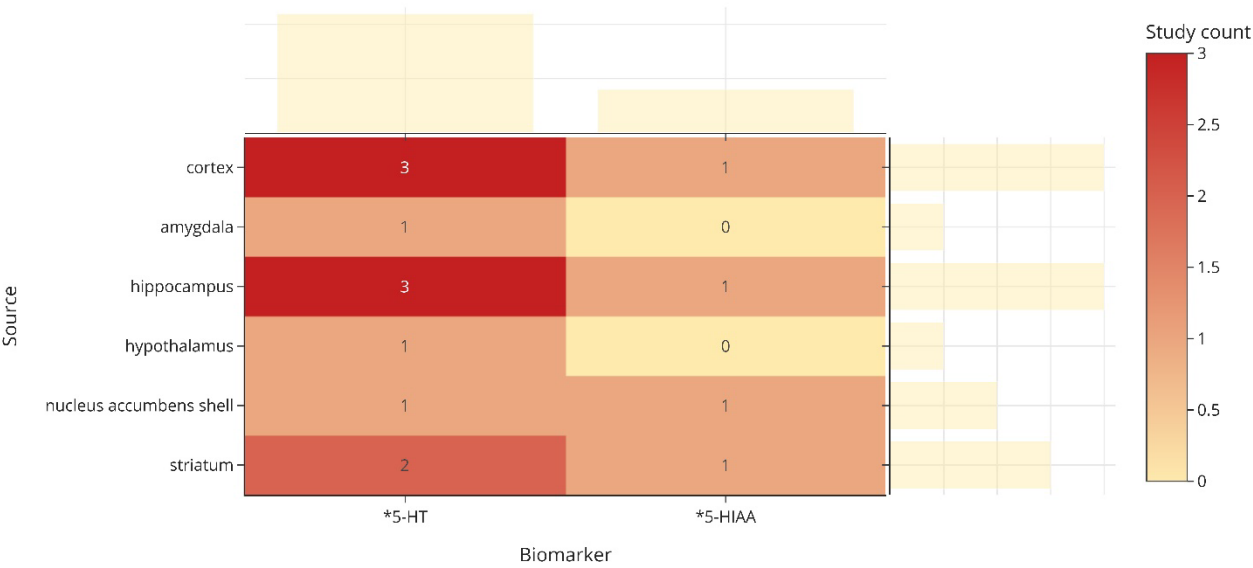

**Figure S2.** Sources of biomarkers in clinical studies (a) and preclinical studies, when the brain regions are collapsed (b) or shown individually (c-d). \*: biomarkers in the serotonin pathway; #: biomarkers in the kynurenine pathway. Here TRP refers to total TRP when unspecified.
