# Supplementary material for: Non-Invasive Brain Stimulation Effects on Biomarkers of Tryptophan Metabolism: A Scoping Review and Meta-Analysis
Source: MDPI journal article supplement (doi:10.3390/ijms23179692), 2022-08-26
Supplement: s1 [file s1]

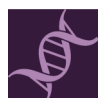

**Table S2.** Studies excluded during full-text screening and reasons, or studies that could not be retrieved.

| Study                            | Reason(s) for exclusion                                                        |
|----------------------------------|--------------------------------------------------------------------------------|
| Abrams et al., 1976 [1]          | Could not retrieve.                                                            |
| Belmaker & Grisaru, 1998 [2]     | Report same data in [3].                                                       |
| Cassidy et al., 1997 [4]         | Assessed biomarker response to tryptophan depletion after ECT series.          |
| Cassidy et al., 2010 [5]         | Assessed biomarker response to tryptophan depletion after ECT series.          |
| Chang et al., 2011 [6]           | Biomarkers of interest not assessed.                                           |
| Costain et al., 1978 [7]         | Not an experiment.                                                             |
| d'Elia et al., 1979 [8]          | Reported same data in [9].                                                     |
| d'Elia et al., 1977 [10]         | Biomarkers of interest not assessed.                                           |
| d'Elia et al., 1978 [11]         | ECT effects on biomarkers not reported (although authors reported collecting). |
| Dalal et al., 1997 [12]          | Kinetics study, not assessing biomarker levels.                                |
| Green, 1978 [13]                 | Not a NIBS experiment.                                                         |
| Ikeda et al., 2005 [14]          | Kinetics study, not assessing biomarker levels.                                |
| Krahn et al., 2000 [15]          | Biomarkers of interest not assessed.                                           |
| Kranaster et al., 2020 [16]      | Post-ECT biomarkers not assessed.                                              |
| Liu et al., 2020 [17]            | Not a NIBS experiment.                                                         |
| Mano et al., 1989 [18]           | Could not retrieve.                                                            |
| Molnar et al., 1979 [19]         | Biomarkers of interest not assessed.                                           |
| Mohamad Safiai et al., 2020 [20] | Protocol, no results reported.                                                 |
| Nordin et al., 1971 [21]         | Merged ECT effects with flurothyl convulsive therapy.                          |
| Olajosy et al., 2018 [22]        | Reporting same data in [23].                                                   |
| Papakostas et al., 1990 [24]     | Biomarkers of interest not assessed.                                           |
| Papakostas et al., 2000 [25]     | Biomarkers of interest not assessed.                                           |
| Peng et al., 2021 [26]           | Biomarker sampling method is dubious.                                          |
| Potter et al., 1987 [27]         | Review.                                                                        |
| Price et al., 1985 [28]          | Biomarkers of interest not assessed.                                           |
| Rausch et al., 1988 [29]         | Platelet uptake study, not assessing biomarker levels.                         |
| Shiiba et al., 2012 [30]         | Invasive, stimulated mice sciatic nerve of directly.                           |
| Wagner et al., 1987 [31]         | Reported same data [32]                                                        |
| Wang et al., 2004 [33]           | Biomarkers of interest not assessed.                                           |

## References

1. Abrams, R., et al., *Concentration of 5-hydroxyindoleacetic acid, homovanillic acid, and tryptophan in the cerebrospinal fluid of depressed patients before and after ECT*. *Biological Psychiatry*, 1976. **11**(1): p. 85-90.
2. Belmaker, R.H. and N. Grisaru, *Magnetic stimulation of the brain in animal depression models responsive to ECS*. *J ECT*, 1998. **14**(3): p. 194-205.

3. Ben-Shachar, D., et al., *Transcranial magnetic stimulation induces alterations in brain monoamines*. J Neural Transm (Vienna), 1997. **104**(2-3): p. 191-7.
4. Cassidy, F., et al., *Lack of Relapse With Tryptophan Depletion Following Successful Treatment With ECT*. The American Journal of Psychiatry, 1997. **154**(8): p. 1151-1152.
5. Cassidy, F., et al., *Combined catecholamine and indoleamine depletion following response to ECT*. Br J Psychiatry, 2010. **196**(6): p. 493-4.
6. Chang, T.G., et al., *Application of electroconvulsive therapy in treatment of retinitis pigmentosa comorbid with major depressive disorder and panic disorder*. J ECT, 2011. **27**(4): p. e57-8.
7. Costain, D.W., D.G. Grahame-Smith, and A.R. Green, *Relevance of the enhanced 5-hydroxytryptamine behavioural responses in rats to electroconvulsive therapy*. British Journal of Pharmacology, 1978. **62**(3): p. 394P.
8. d'Elia, G., J. Lehmann, and H. Raotma, *Bimodal distribution of serum tryptophan level*. Acta Psychiatr Scand, 1979. **60**(1): p. 10-6.
9. d'Elia, G., J. Lehmann, and H. Raotma, *Evaluation of the combination of tryptophan and ECT in the treatment of depression*. Acta Psychiatrica Scandinavica, 1977. **56**(4): p. 319-334.
10. d'Elia, G., J. Lehmann, and H. Raotma, *Evaluation of the combination of tryptophan and ECT in the treatment of depression*. Acta Psychiatrica Scandinavica, 1977. **56**(4): p. 303-318.
11. d'Elia, G., J. Lehmann, and H. Raotma, *Influence of tryptophan on memory functions in depressive patients treated with unilateral ECT*. Acta Psychiatr Scand, 1978. **57**(3): p. 259-68.
12. Dalal, P.K., et al., *Ect and platelet 5ht uptake in major depression*. Indian J Psychiatry, 1997. **39**(4): p. 272-7.
13. Green, A.R., *Repeated exposure of rats to the convulsant agent flurothyl enhances 5-hydroxytryptamine- and dopamine-mediated behavioural responses*. British Journal of Pharmacology, 1978. **62**(3): p. 325-331.
14. Ikeda, T., et al., *Modulation of monoamine transporter expression and function by repetitive transcranial magnetic stimulation*. Biochem Biophys Res Commun, 2005. **327**(1): p. 218-24.
15. Krahn, L.E., et al., *The Effects of Electroconvulsive Therapy on Melatonin*. The Journal of ECT, 2000. **16**(4): p. 391-398.
16. Kranaster, L., et al., *The novel seizure quality index for the antidepressant outcome prediction in electroconvulsive therapy: association with biomarkers in the cerebrospinal fluid*. Eur Arch Psychiatry Clin Neurosci, 2020. **270**(7): p. 911-919.
17. Liu, H., et al., *Effects of repetitive magnetic stimulation on motor function and GAP43 and 5-HT expression in rats with spinal cord injury*. J Int Med Res, 2020. **48**(12): p. 300060520970765.
18. Mano, Y., et al., *[The kinesiological, chemical and pathological analysis in pulsed magnetic stimulation to the brain]*. Rinsho Shinkeigaku, 1989. **29**(8): p. 982-8.
19. Molnar, L., I. Degrell, and S. Rochlitz, *[Effect of bilateral and unilateral electroconvulsive therapy (ECT) on the composition of the cerebrospinal fluid (CSF). A possibility to calculate the intracellular redox changes of the brain in humans (author's transl)]*. Arch Psychiatr Nervenkr (1970), 1979. **227**(2): p. 159-69.
20. Mohamad Safiai, N.I., et al., *Effectiveness and tolerability of repetitive transcranial magnetic stimulation for preventive treatment of episodic migraine: a single-centre, randomised, double-blind, sham-controlled phase 2 trial (Magnet-EM)*. Trials, 2020. **21**(1): p. 923.
21. Nordin, G., J.O. Ottosson, and B.E. Roos, *Influence of convulsive therapy on 5-hydroxyindoleacetic acid and homovanillic acid in cerebrospinal fluid in endogenous depression*. Psychopharmacologia, 1971. **20**(4): p. 315-20.
22. Olajosy, M., et al., *Differences in the dynamics of changes in the concentration of kynurenic acid in the blood serum of depressed patients treated with electroconvulsive therapy*. Psychiatr Danub, 2018. **30**(3): p. 331-339.

23. Olajosy, M., et al., *Blood serum concentrations of kynurenic acid in patients diagnosed with recurrent depressive disorder, depression in bipolar disorder, and schizoaffective disorder treated with electroconvulsive therapy*. Psychiatr Pol, 2017. **51**(3): p. 455-468.
24. Papakostas, Y., et al., *Thyrotropin and Prolactin Secretion During ECT: Implications for the Mechanism of ECT Action*. Convuls Ther, 1990. **6**(3): p. 214-220.
25. Papakostas, Y.G., et al., *Administration of Citalopram Before ECT: Seizure Duration and Hormone Responses*. The Journal of ECT, 2000. **16**(4): p. 356-360.
26. Peng, Y., et al., *The Clinical Efficacy and Possible Mechanism of Combination Treatment of Cerebral Ischemic Stroke with Ginkgo Biloba Extract and Low-Frequency Repetitive Transcranial Magnetic Stimulation*. Sichuan Da Xue Xue Bao Yi Xue Ban, 2021. **52**(5): p. 883-889.
27. Potter, W.Z., et al., *Effects of psychotropic drugs on neurotransmitters in man*. Life Sciences, 1987. **41**(7): p. 817-820.
28. Price, W.A. and B. Zimmer, *Effects of L-Tryptophan on Electroconvulsive Therapy Seizure Time*. The Journal of Nervous and Mental Disease, 1985. **175**(10): p. 636-638.
29. Rausch, J.L., C.L. Rich, and S.C. Risch, *Platelet serotonin transport after a single ECT*. Psychopharmacology (Berl), 1988. **95**(1): p. 139-41.
30. Shiiba, S.J., et al., *Cutaneous magnetic stimulation reduces rat chronic pain via activation of the supra-spinal descending pathway*. Cell Mol Neurobiol, 2012. **32**(2): p. 245-53.
31. Wagner, A., et al., *Effects of Antidepressant Treatments on Platelet Tritiated Imipramine Binding in Major Depressive Disorder*. Archives of General Psychiatry, 1987. **44**(10): p. 870-877.
32. Aberg-Wistedt, A., et al., *Electroconvulsive Therapy Effects on Cerebrospinal Fluid Monoamine Metabolites and Platelet Serotonin Uptake In Melancholia*. Convulsive Therapy, 1986. **2**(2): p. 91-98.
33. Wang, M., et al., *[Study on the influence of simulative EEG modulation magnetic field on the discharge of median raphe nuclei]*. Sheng Wu Yi Xue Gong Cheng Xue Za Zhi, 2004. **21**(2): p. 219-24.
