# Supplementary material for: Non-Invasive Brain Stimulation Effects on Biomarkers of Tryptophan Metabolism: A Scoping Review and Meta-Analysis
Source: Int J Mol Sci. 2022 Aug 26;23(17):9692. doi: 10.3390/ijms23179692 (PMC9456364; doi:10.3390/ijms23179692)
Supplement: Supplementary file 1 [file ijms-23-09692-s001.zip]

Archive with 7 entries (7 files):
- Figure S1 Biomarkers by individual regions.pdf
- Figure S2 - Sources of biomarkers.pdf
- PRISMA-ScR_checklist.pdf
- Supplementary Spreadsheets.xlsx
- Supplementary Text.pdf
- Table S1 - Search queries.pdf
- Table S2 - Excluded studies.pdf
