# Supplementary material for: Non-Invasive Brain Stimulation Effects on Biomarkers of Tryptophan Metabolism: A Scoping Review and Meta-Analysis
Source: Int J Mol Sci. 2022 Aug 26;23(17):9692. doi: 10.3390/ijms23179692 (PMC9456364; doi:10.3390/ijms23179692)
Supplement: Supplementary file 1 [file ijms-23-09692-s001.zip › Supplementary Spreadsheets.xlsx]

## Sheet: Clinical_Measures_and_SMD
Study	Design	Protocol	Participants	Demographics	Clinical measure	Result	SMD	Source	Timing of post-NIBS sampling	Biomarker	Result	SMD	Remarks
													↑: significantly increased or the experimental level significantly higher than the control one
													↓: significantly decreased or the experimental level significantly lower than the control one
													ns: nonsignificantly changed or different
													*, #, and $: data not available for the featured group but taken from a larger group it belonged to or a subgroup of it
													-: not applicable or data not available
ECT
Aarsland et al., 2019	pretest-posttest	Site: right unilateral Seizure length: *median 50.7 s, IQR 16 s Session N: *max. 20 Session frequency: 3/week	depression (uni- and bipolar, with and without psychotic symptoms)	N: 21 M:F: *44:56% Age: *median 46, IQR 21.0	MADRS	↓	-3.20625	serum	1-2 weeks after the last session (median 10 days, IQR 6)	TRP	ns	-0.650455	*N: 27
										KYN	ns	-0.0710526
										KA	ns	-0.0359043
										3-HK	ns	0.92093
										QA	ns	0.292857
										PA	↑	0.64726
										XA	ns	0.427247
										AA	ns	0.171429
										KYN/TRP	ns	-0.123476
										KA/KYN	ns	0.238235
										KA/3-HK	ns	0.320734
										QA/KA	ns	-0.281984
										XA/3-HK	ns	0.146512
										PA/QA	↑	1.13945
Aberg-Wistedt et al., 1986	pretest-posttest	Site: bifrontotemporal Seizure length: *45.0+-8.2 s Session N: *8.0+-3.1 Session frequency: 3/week	depression (unipolar, without psychotic symptoms)	N: 11 M:F: *33:67% Age: *56+-16.2	MADRS	*↓	-3.94737	CSF	3 weeks after the last session	5-HIAA	ns	0.40597	*N: 12
Allen et al., 2018	pretest-posttest	Site: bitemporal Session N: max. 6 Session frequency: 2/week	TRD (unipolar)	N: 18 M:F: 33:67% Age: 57.5+-14.7	HRSD-17	-	-	plasma	4-7 days after the last session	TRP	ns	-0.252538
										KYN	ns	0.166378
										KA	ns	-0.024383
										KYN/TRP	ns	0.309359
										KA/KYN	ns	-0.206239
D'Elia, Lehmann and Raotma, 1977	pretest-posttest	Site: nondominant unilateral Session N: mean 6.1, range 3-12	depression (uni- and bipolar)	N: 24 M:F: 38:63% Age: 48.0+-12.5, range 22-64	CODS	-	-	serum	mean of levels sampled before each session from the second to the last.	TRP	ns	-0.133333	Cronholm-Ottosson Depression Scale: ↓ improved
Guloksuz et al., 2015	pretest-posttest	Site: bifrontotemporal Seizure length: mean 52 s, range 10-200 s Session N: mean 6.1, range 3-11 Session frequency: 2/week	TRD (uni- and bipolar)	N: 19 M:F: 32:68% Age: 52.6+-14.4, range 23-74	BDI	↓	-	serum	before every other session	TRP	ns	-
					HRSD-17	↓	-			KYN	ns	-
										KA	↑	-
										3-HK	ns	-
										5-HIAA	ns	-
										KYN/TRP	↑	-
										KA/KYN	↑	-
										KA/3-HK	↑	-
										5-HIAA/KYN	ns	-
Hasani et al., 2019	nonrandomised, parallel	Site: bifrontotemporal Session N: 6-8 Session frequency: every other day	TRD (unipolar)	Experimental group N: 21 Age: 35.24+-14.17 Control group N: 15 Age: 33.26+-13.59	none	-	-	plasma	16 days after the first session	5-HT	↑ (posttest)	0.693359
									30 days after the first session		↑ (posttest)	0.722915
Hoekstra et al., 2001	pretest-posttest	Site: unilateral and bifrontotemporal Session N: mean 11 Session frequency: 2/week	TRD (unipolar, with and without psychotic symptoms)	N: 20 M:F: 35:65% Age: 52+-13.1	HRSD	-	-	plasma	the morning after the final session	TRP	ns	0.355556
Hoffmann et al., 1985	pretest-posttest	Site: bitemporal Session N: *mean 11, range 6-19 Session frequency: 3/week	depression (uni- and bipolar, with and without psychotic symptoms)	N: 7 all male Age: 46+-11.2, range 29-61	HRSD-24	↓	-4.20463	CSF	12 days after the last session	5-HIAA	ns	0.466218	*N: 11
Hofmann et al., 1996	pretest-posttest	Site: bifrontotemporal Seizure length: 40.48+-14.12 s Session N: 1	depression (unipolar)	N: 31 M:F: 29:71% Age: 37.22+-13.98	none	-	-	serum	1 min after the session	5-HIAA	ns	-0.0891089
									1 h after the session		↓	-0.514851
									2 h after the session		↓	-0.663366
Jori et al., 1975	pretest-posttest	Session N: 4-8	depression (with psychotic symptoms)	N: 12 M:F: *88:12% Age: *mean 45, range 25-63	an arbitrary score from 0 (no improvement) to 4 (complete recovery)	-	-	CSF	7 days after the final session	5-HIAA	↑	1.87639	*N: 26
Kirkegaard, Møller and Bjørum, 1978	pretest-posttest	Site: unilateral Session N: 10.5+-2.6 Session frequency: 2/week	depression (uni- and bipolar)	N: 10 M:F: 30:70% Age: mean 63	HRSD-17	ns	-2.57522	CSF	-	TRP	ns	0.5
								plasma		TRP	↓	-0.803279
										free TRP	ns	0.1
										free TRP/TRP	↑	1
Lestra et al., 1998	pretest-posttest	Session N: 5-9 Session frequency: every 3 or 4 days	depression (unipolar)	N: 6 M:F: *43:57% Age: *range 27-70	HRSD-17, PRS, and SSS	-	-	platelet pellet	10 days after the last session	5-HT	ns	-	*N: 30
Mokhtar et al., 1997	pretest-posttest	Site: bilateral Seizure length: 20 s in nine, a mild fit in one Session N: 1	depression (uni- and bipolar)	N: 10 M:F: 50:50% Age: mean 48.5, SEM 4.3	none	-	-	serum	15 min after the session	TRP	ns	-0.737865
									30 min after the session		ns	-0.737865
									45 min after the session		↓	-0.948683
									1 h after the session		↓	-1.37032
Nikisch and Mathé, 2008	pretest-posttest	Site: unilateral Session N: 8 Session frequency: 2/week	TRD (unipolar, with and without psychotic symptoms)	N: 6 M:F: 83:17% Age: 40+-8	HRSD-21	↓	-1.375	CSF	1 week after the last session	5-HIAA	↑	5.38445
Olajossy et al., 2017	pretest-posttest	Site: bifrontotemporal Session N: 12 Session frequency: 2/week	recurrent depressive disorder	N: 32 M:F: 41:59% Age: 49.41+-12.73	MADRS	-	-	serum	30 min after the first, sixth, and 12th sessions	KA	ns	-
					GAF	-	-						Global Assessment of Functioning: ↑ improved
			depression in bipolar disorder	N: 11 M:F: 36:64% Age: 44.73+-13.83	MADRS	-	-				ns	-
					GAF	-	-
			schizoaffective disorder	N: 7 M:F: 43:57% Age: 33.29+-8.56	MADRS	-	-				ns	-
					GAF	-	-
Palmio et al., 2005	pretest-posttest	Site: bilateral Seizure length: 45.7+-13.2, range 21-66 Session N: 3.8+-2.2, range 1-7	depression (unipolar, with and without psychotic symptoms)	N: 10 M:F: 30:70% Age: 55.6+-15.8, range 28-73	MADRS	↓	-3.23255	plasma	2 h after the last session	TRP	↑	1.41791
									6 h after the last session		↑	1.92537
									24 h after the last session		↑	1.46269
									48 h after the last session		ns	0.0895522
Rudorfer et al., 1991	pretest-posttest	Site: uni- and bilateral Seizure length: at least 25 s Session N: 13.6+-3.3, range 9-19	TRD (unipolar)	N: 8 M:F: 25:75% Age: 53.1+-13.2, range 35-71	modified Bunney-Hamburg scale	↓	-3.38889	CSF	5-10 days after the last session	5-HIAA	ns	0.490566	modified Bunney-Hamburg scale: ↓ improved
Ryan et al., 2020	pretest-posttest	Site: unilateral and bitemporal Session N: 7.97+-2.46 Session frequency: 2/week	depression (uni- and bipolar, with and without psychotic symptoms)	N: 94 M:F: 38:62% Age: 55.48+-14.72	HRSD-24	↓	-3.55708	plasma	1-3 days after the last session	XA/3-HK	ns	0.0866873
Ryan et al., 2020	pretest-posttest	Site: unilateral and bitemporal Session N: 7.96+-2.47 Session frequency: 2/week	depression (uni- and bipolar, with and without psychotic symptoms)	N: 94 M:F: 38:62% Age: 55.48+-14.72	HRSD-24	↓	-3.1309	plasma	1-3 days after the last session	TRP	ns	0.187443
										KYN	ns	0.297872
										KA	ns	0.138002
										3-HK	ns	0.226982
										QA	ns	0.133404
										PA	ns	0.0834942
										XA	ns	0.214178
										AA	ns	0.228643
										KYN/TRP	ns	0.138298
										KA/KYN	ns	-0.0659341
										QA/KA	ns	0.0296128
										QA/KYN	ns	-0.0508021
Sawa, 1981	pretest-posttest	Session N: 1	depression (uni- and bipolar)	N: 9 M:F: 44:56% Age: 40.7+-11.8, range 20-52	HRSD	*↓	-	plasma	1 min after the session	TRP	ns	-0.140795	*N: 6
					Bojanovsky's rating scale	*↓	-			free TRP	↑	0.331095	Bojanovsky's rating scale: ↓ improved
					SDS	*↓	-		5 min after the session	TRP	↓	-0.412122	Self-rating Depression Scale: ↓ improved
										free TRP	ns	0.029217
									10 min after the session	TRP	↓	-0.417648
										free TRP	ns	-0.0881863
									30 min after the session	TRP	ns	-0.331086
										free TRP	ns	-0.188698
									1 h after the session	TRP	ns	0.00404046
										free TRP	↓	-0.296382
Schwieler et al., 2016	pretest-posttest	Site: right unilateral Session N: 3	TRD (unipolar)	N: 15 M:F: *58:42% Age: *median 41.0, IQR 25.0-54.0	MADRS	#↓	-1.46895	plasma	-	TRP	↓	-	*N: 19, #pre 18, post 15, $N: 14
										KYN	$↓	-
										KA	ns	-
										QA	↓	-
										KYN/TRP	ns	-
										QA/KA	↓	-
Smith and Strömgren, 1981	pretest-posttest	Site: nondominant unilateral Session frequency: 4/week	depression	N: 13 M:F: 69:31% Age: 42.7+-12.5, range 24-61	Strömgren's rating scale	↓	-2.55582	serum	9 am on the day after the last session	TRP	ns	-0.130971	Strömgren's rating scale: ↓ improved
Stelmasiak and Curzon, 1974	pretest-posttest	Site: unilateral Session N: 1	depression	N: 18 M:F: 39:61% Age: mean 48, range 20-70	none	-	-	plasma	1 min after the session	TRP	ns	-0.219251
										free TRP	↑	0.878049
									15 min after the session	TRP	ns	0.197861
										free TRP	↑	0.609756
									30 min after the session	TRP	ns	0.122995
										free TRP	ns	0.463415
									1 h after the session	TRP	ns	-0.540107
										free TRP	ns	-0.0487805
Udayakumar et al., 1981	pretest-posttest	Site: bitemporal Session N: 1	schizophrenia	N: 29 M:F: 66:34% Age: 27.4+-8.0, range 14-49	none	-	-	CSF	5 min after the session	5-HT	↑	0.871169
									48-72 h after the session		ns	0.351064
Whalley, Yates and Christie, 1980	pretest-posttest	Session N: *4-9	depression (unipolar, without psychotic symptoms)	N: 11 M:F: *25:75% Age: *49+-13.9	HRSD-20	↓	-1.94737	plasma	10 min after the first session	TRP	↓	-0.629213	*N: 12, #N: 9, $N: 7
										free TRP	ns	0.1
									immediately before the last session	TRP	#ns	-0.195652
										free TRP	#ns	-0.105263
									12 weeks after the last session	TRP	$ns	-0.639535
										free TRP	$ns	-0.666667
TMS
Leblhuber et al., 2021	pretest-posttest	Site: medial frontopolar cortex or Brodmann Area 10 Pulse frequency: 20 Hz Intensity: 1.5 T Pulse N: 2400 Session N: 10 Session frequency: 5/week	TRD (unipolar)	N: 21 M:F: 48:52% Age: 59.4+-15.7	HRSD-7	↓	-1.27294	serum	-	TRP	ns	-0.302521
										KYN	ns	0.0967742
										KYN/TRP	ns	0.195489
Leblhuber, Steiner and Fuchs, 2019	randomised, parallel	Site: biprefrontal cortex Pulse frequency: 3 Hz Intensity: 0.08 T Pulse N: 30 min Session N: 10 Session frequency: 5/week	TRD (geriatric)	Experimental group N: 19 M:F: *45:55% Age: mean 71.9, SEM 2.92 Control group N: 10 M:F: *45:55% Age: mean 73.3, SEM 2.69	HRSD-7	↓ (group*time)	-0.700959	serum	immediately after the last session	TRP	ns (group*time)	-0.3931	*Experimental group N: 29, Control group N: 29
										KYN	ns (group*time)	0.160591
										KYN/TRP	ns (group*time)	0.353645
Leblhuber et al., 2018	pretest-posttest	Site: biprefrontal cortex Pulse frequency: 3 Hz Intensity: above 100% MT Session N: 10	TRD (geriatric)	N: 10 M:F: 40:60% Age: 69+-8.78	HRSD-7	↓	-1.54545	serum	-	TRP	ns	-0.131737
										KYN	ns	0.242424
										KYN/TRP	ns	0
Liu et al., 2022	randomised, parallel	Site: bidorolateral and ventrolateral prefrontal cortex Pulse frequency: 0.5 Hz Intensity: 0.70 T Session N: 8 Session frequency: 5/week	post-stroke depression	Experimental group N: 35 M:F: 57:43% Age: 55.61+-6.84 Control group N: 35 M:F: 66:34% Age: 50.20+-6.28	PHQ-9	↓ (posttest)	-3.39314	serum	8 weeks after the last session	5-HT	↑ (posttest)	1.5796	Patient Health Questionnaire-9: ↓ improved
					MBI	↑ (posttest)	2.49168						Modified Barthel Index: ↑ improved
Lu et al., 2018	pretest-posttest	Site: bidorsolateral prefrontal cortex Pulse frequency: 1 Hz Intensity: 80% MT Pulse N: 750 Session N: 10 Session frequency: 5/week	generalised anxiety disorders	N: 28 M:F: 39:61% Age: 45.5+-12.67, range 27-72	HRSA	↓	-1.68525	serum	1 h after the last session	5-HT	↑	1.19084
Maestú et al., 2013	randomised, parallel	Site: 33 stimulation coils distributed evenly across an EEG cap Pulse frequency: 8 Hz Intensity: 43 nT Pulse N: 20 min Session N: 8 Session frequency: 1/week	fibromyalgia	Experimental group N: 28 all female Age: *40.7+-6.7 Control group N: 26 all female Age: *40.7+-6.7	pain thresholds at 18 sensitive (tender) points	↑ (group*time)	0.709468	blood	-	5-HT	ns (group*time)	0.0248831	*Experimental group N: 54, Control group N: 54
													pain thresholds: ↑ improved
Miniussi et al., 2005	pretest-posttest	Site: left dorsolateral prefrontal cortex Pulse frequency: 17 Hz Intensity: 110% MT Pulse N: 408 Session N: 5 Session frequency: 1/day	TRD (uni- and bipolar, with and without psychotic symptoms)	N: 10 M:F: *25:75% Age: mean 58	HRSD-21	↓	1.09333	plasma	the day of the last session	5-HT	ns	-	*N: 20
					BPRS	↓				5-HIAA	ns	-	Brief Psychiatric Rating Scale: ↓ improved
		Pulse frequency: 1 Hz Pulse N: 400		N: 10 M:F: *25:75% Age: mean 52	HRSD-21	↓	0.693611			5-HT	ns	-	*N: 20
					BPRS	↓				5-HIAA	ns	-
Niimi et al., 2020	nonrandomised, parallel	Site: primary motor cortex of the unaffected hemisphere Pulse frequency: 1 Hz Intensity: 90% MT Pulse N: 1200 Session N: 22 Session frequency: 2/day	stroke	Experimental group N: 62 M:F: 66:34% Age: 62.3+-11.0 Control group N: 33 M:F: 52:48% Age: 66.2+-10.8	BDI	-	-	serum	-	TRP	ns	-0.155463
					FMA	↑				KYN	ns	0.298814	Fugl-Meyer Assessment: ↑ improved
										KYN/TRP	ns	0.00942278
Sibon et al., 2007	randomised, crossover	Site: left dorsolateral prefrontal cortex Pulse frequency: 10 Hz Intensity: 90% MT Pulse N: 450 Session N: 1	healthy	N: 10 M:F: 50:50% Age: 24.7+-5.14, range 18-40	none	-	-	plasma	-	TRP	ns	-0.0965517
										free TRP	ns	-0.269231
Tateishi et al., 2021	pretest-posttest	Site: left dorsolateral prefrontal cortex Pulse frequency: 10 Hz Intensity: 100% MT Pulse N: 1600 Session N: 30 Session frequency: 5/week	TRD (unipolar)	N: 13 M:F: 31:69% Age: 54.9+-14.3	HRSD-24	↓	-1.39955	plasma	-	TRP	↑	0.33466
										oxitriptan	ns	0.791856
										5-HT	↓	-0.632117
										melatonin	ns	-0.150041
										KYN	ns	0.0859117
										KA	ns	-0.112257
										3-HK	ns	0.410505
										KYN/TRP	ns	-0.272727
Tateishi et al., 2022	pretest-posttest	Site: left dorsolateral prefrontal cortex Pulse frequency: 10 Hz Intensity: 100% MT Pulse N: 1600 Session N: 30 Session frequency: 5/week	TRD (unipolar)	N: 5 Age: 48.0+-13.9, range 30-72	HRSD-24	↓	-1.41304	CSF	-	TRP	ns	3.8984
										5-HT	ns	0.0216357
										KYN	↑	2.62191
										KA	ns	0.023685
										3-HK	ns	0.441703
tDCS
Hadoush et al., 2021	pretest-posttest	Site: biprimary motor cortex and bidorsolateral prefrontal cortex Polarity: anodal Electrode size: 25 cm2 Intensity: 1 mA Duration: 20 min Session N: 10 Session frequency: 5/week	Parkinson's disease	N: 25 M:F: 76:24% Age: mean 61.5, range 30-80	GDS	↓	-0.426667	serum	-	melatonin	↓	-0.372727	Geriatric Depression Scale: ↓ improved
					PSQI	↓	-0.30303						Pittsburgh Sleep Quality Index: ↓ improved

## Sheet: RoBMA_Outcomes
Biomarker	Source	Pretest-posttest correlation (r)	Effect BF10	Heterogeneity BF10	Publication Bias BF10	Study N	Studies
ECT
TRP	plasma	0.5	0.216	10.191	0.645	8	Allen et al., 2018	Hoekstra et al., 2001	Kirkegaard, Møller and Bjørum, 1978	Palmio et al., 2005	Ryan et al., 2020	Sawa, 1981	Stelmasiak and Curzon, 1974	Whalley, Yates and Christie, 1980
		0.7	0.278	39.36	0.891
		0.9	0.183	104501	7.014
TRP	serum	0.5	3.581	1.536	0.554	4	Aarsland et al., 2019	D'Elia, Lehmann and Raotma, 1977	Mokhtar et al., 1997	Smith and Strömgren, 1981
		0.7	3.407	3.58	0.459
		0.9	2.119	92.019	0.393
free TRP	plasma	0.5	0.465	2.857	0.773	4	Kirkegaard, Møller and Bjørum, 1978	Sawa, 1981	Stelmasiak and Curzon, 1974	Whalley, Yates and Christie, 1980
		0.7	0.398	13.335	0.719
		0.9	0.323	1380.01	1.038
5-HIAA	CSF	0.5	0.516	0.924	25.393	5	Aberg-Wistedt et al., 1986	Hoffmann et al., 1985	Jori et al., 1975	Nikisch and Mathé, 2008	Rudorfer et al., 1991
		0.7	0.647	0.882	48.709
		0.9	0.573	0.627	225.193
KA	plasma	0.5	0.174	0.568	0.656	2	Allen et al., 2018	Ryan et al., 2020
		0.7	0.174	0.629	0.978
		0.9	0.269	2.267	1.015
KYN	plasma	0.5	0.904	1.285	1.198	2	Allen et al., 2018	Ryan et al., 2020
		0.7	1.346	1.494	0.988
		0.9	1.848	1.526	0.785
KA/KYN	plasma	0.5	0.174	0.468	0.461	2	Allen et al., 2018	Ryan et al., 2020
		0.7	0.178	0.46	0.461
		0.9	0.309	0.782	0.517
KYN/TRP	plasma	0.5	0.275	0.612	1.248	2	Allen et al., 2018	Ryan et al., 2020
		0.7	0.336	0.689	1.868
		0.9	0.591	1.237	3.332
Clinical Measures		0.5	2725000	3.122	0.734	12	Aarsland et al., 2019	Aberg-Wistedt et al., 1986	Hoffmann et al., 1985	Kirkegaard, Møller and Bjørum, 1978	Nikisch and Mathé, 2008	Palmio et al., 2005	Rudorfer et al., 1991	Ryan et al., 2020	Ryan et al., 2020	Schwieler et al., 2016	Smith and Strömgren, 1981	Whalley, Yates and Christie, 1980
		0.7	2035000	8.881	0.691
		0.9	1603000	62.909	0.655
TMS
TRP	plasma	0.5	0.279	0.699	0.633	2	Sibon et al., 2007	Tateishi et al., 2021
		0.7	0.242	0.732	0.683
		0.9	0.197	1.306	1.271
TRP	serum	0.5	1.12	0.576	0.459	4	Leblhuber et al., 2021	Leblhuber, Steiner and Fuchs, 2019	Leblhuber et al., 2018	Niimi et al., 2020
		0.7	2.418	0.57	0.727
		0.9	11.083	0.52	0.839
5-HT	serum	0.5	5.46	0.804	1.598	2	Liu et al., 2022	Lu et al., 2018
		0.7	5.377	0.777	1.678
		0.9	9.232	0.79	1.504
KYN	serum	0.5	0.289	0.483	1.262	4	Leblhuber et al., 2021	Leblhuber, Steiner and Fuchs, 2019	Leblhuber et al., 2018	Niimi et al., 2020
		0.7	0.288	0.427	1.553
		0.9	0.364	0.361	2.56
KYN/TRP	serum	0.5	0.217	0.505	1.113	4	Leblhuber et al., 2021	Leblhuber, Steiner and Fuchs, 2019	Leblhuber et al., 2018	Niimi et al., 2020
		0.7	0.243	0.562	1.527
		0.9	0.484	1.585	1.8
Clinical Measures		0.5	808.397	1392.64	0.857	10	Leblhuber et al., 2021	Leblhuber, Steiner and Fuchs, 2019	Leblhuber et al., 2018	Liu et al., 2022	Lu et al., 2018	Maestú et al., 2013	Miniussi et al., 2005	Miniussi et al., 2005	Tateishi et al., 2021	Tateishi et al., 2022
		0.7	978.898	6024.17	0.879
		0.9	1199.88	2069000	0.871
